# Supplementary material
Source: ML conference proceedings conference paper supplement (https://proceedings.neurips.cc/paper_files/paper/2022/hash/de6ff07cbd222c10d694c2b2f732aceb-Abstract.html)
Supplement: Supplementary file 1 [file de6ff07cbd222c10d694c2b2f732aceb-Supplemental-Datasets_and_Benchmarks.zip]

Archive with 4 entries (4 files):
- MultiModalRobustness_NeurIPSDatasetTrack2022__CameraReady_-3-compressed.pdf
- __MACOSX/._MultiModalRobustness_NeurIPSDatasetTrack2022__CameraReady_-3-compressed.pdf
- sample_videos_MSRVTT.zip
- __MACOSX/._sample_videos_MSRVTT.zip
